# Supplementary figures and images for: The Contributions of Sub-Communities to the Assembly Process and Ecological Mechanisms of Bacterial Communities along the Cotton Soil–Root Continuum Niche Gradient
Source: MDPI journal article supplement (doi:10.3390/microorganisms12050869), 2024-04-26

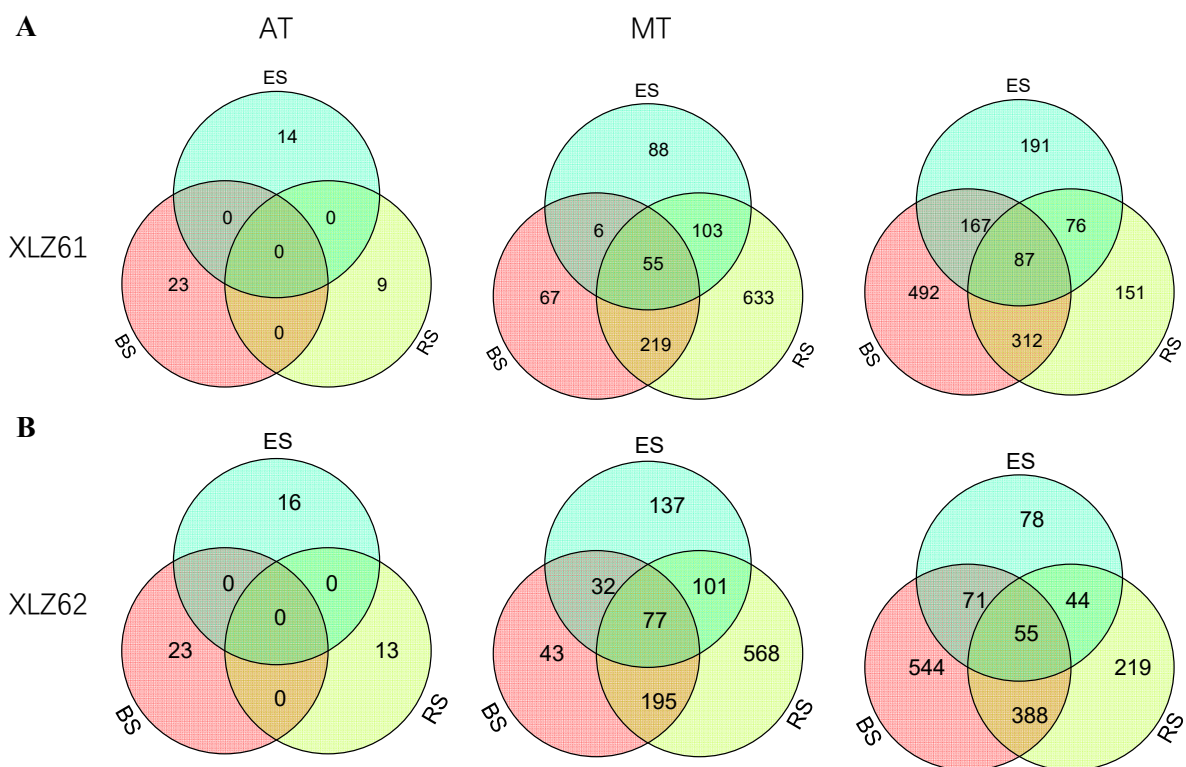

Fig S1

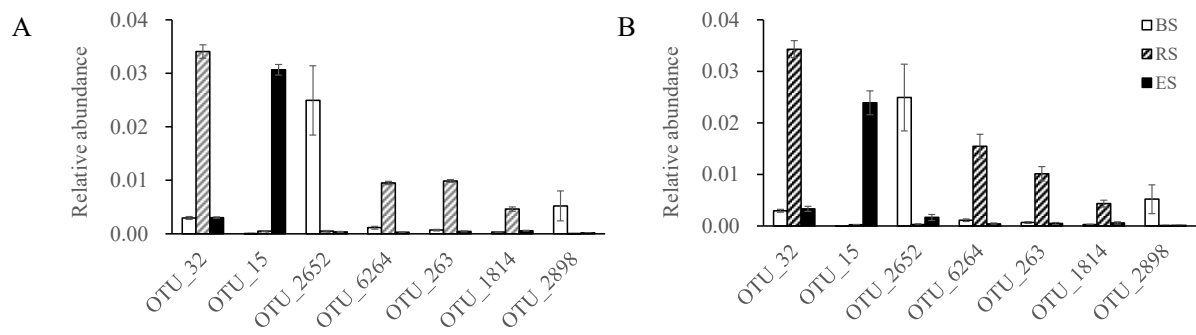

Fig S2

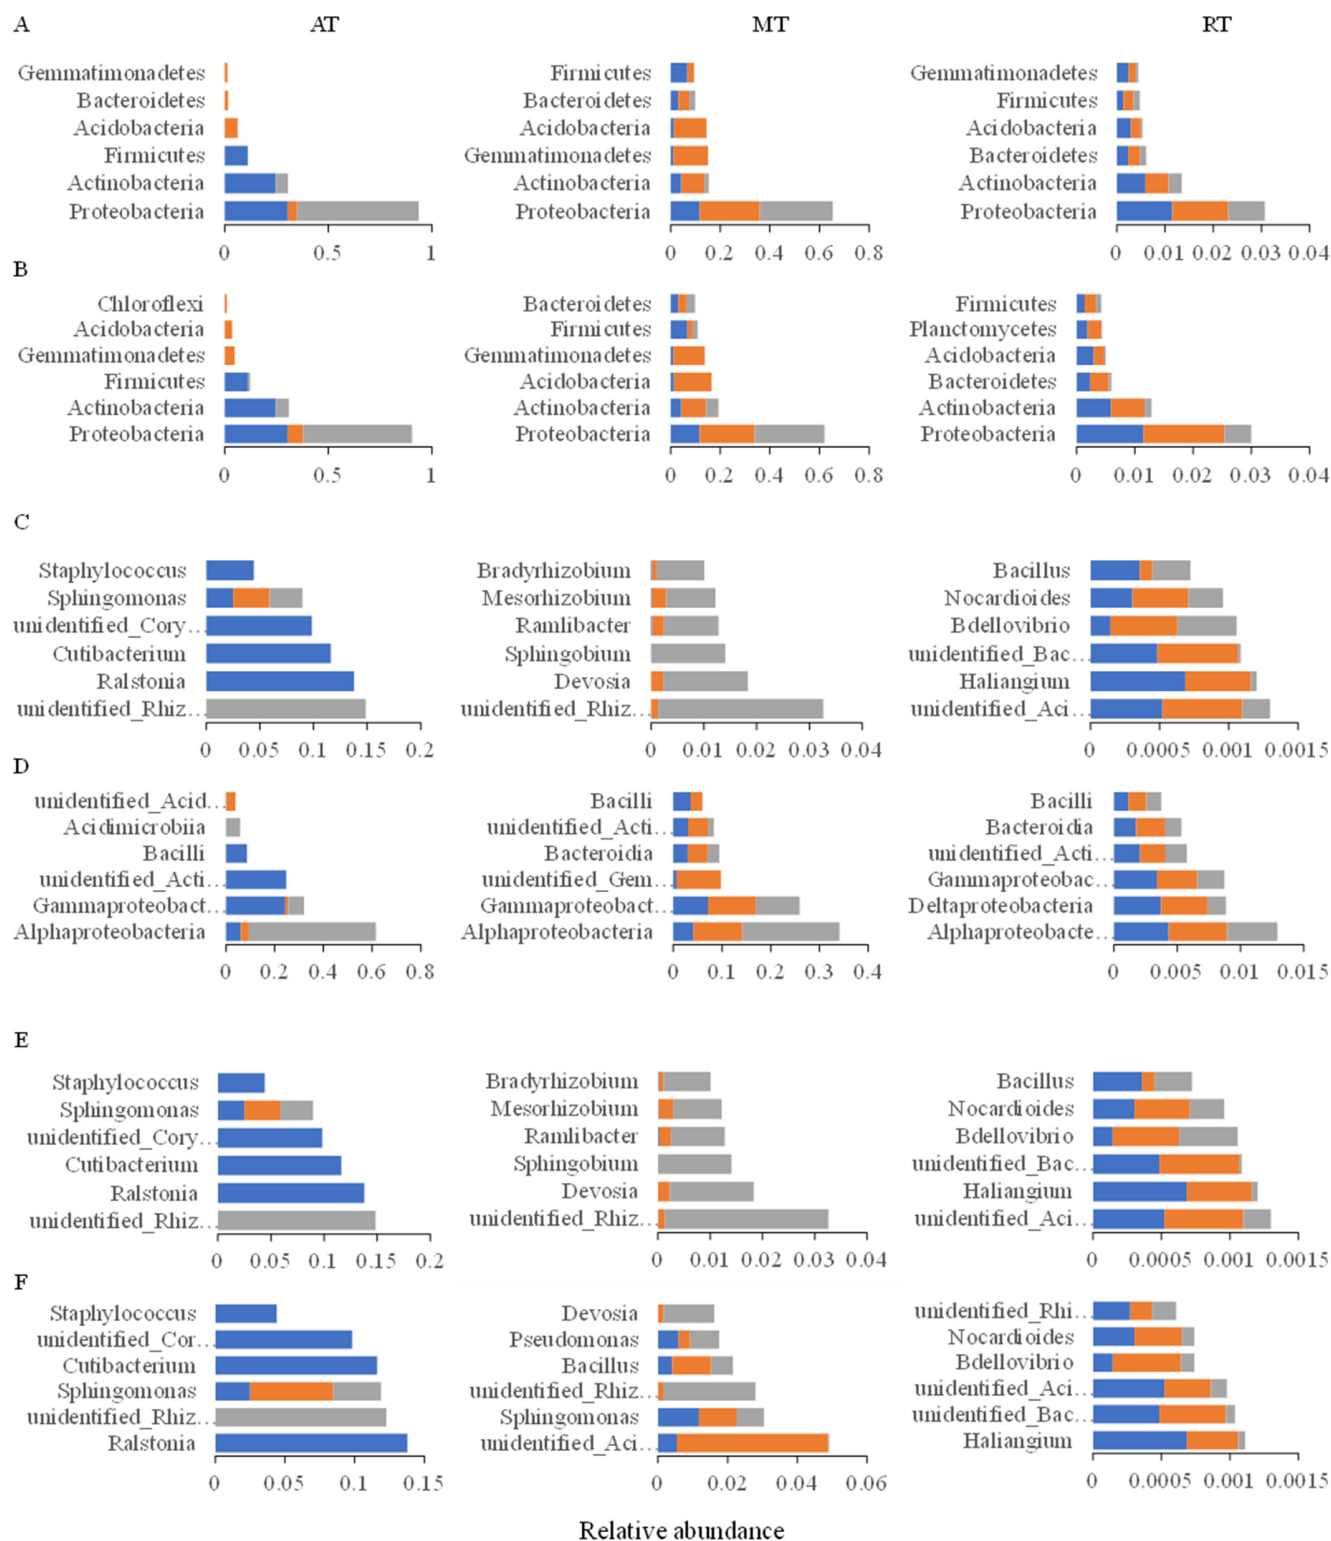

Fig S3

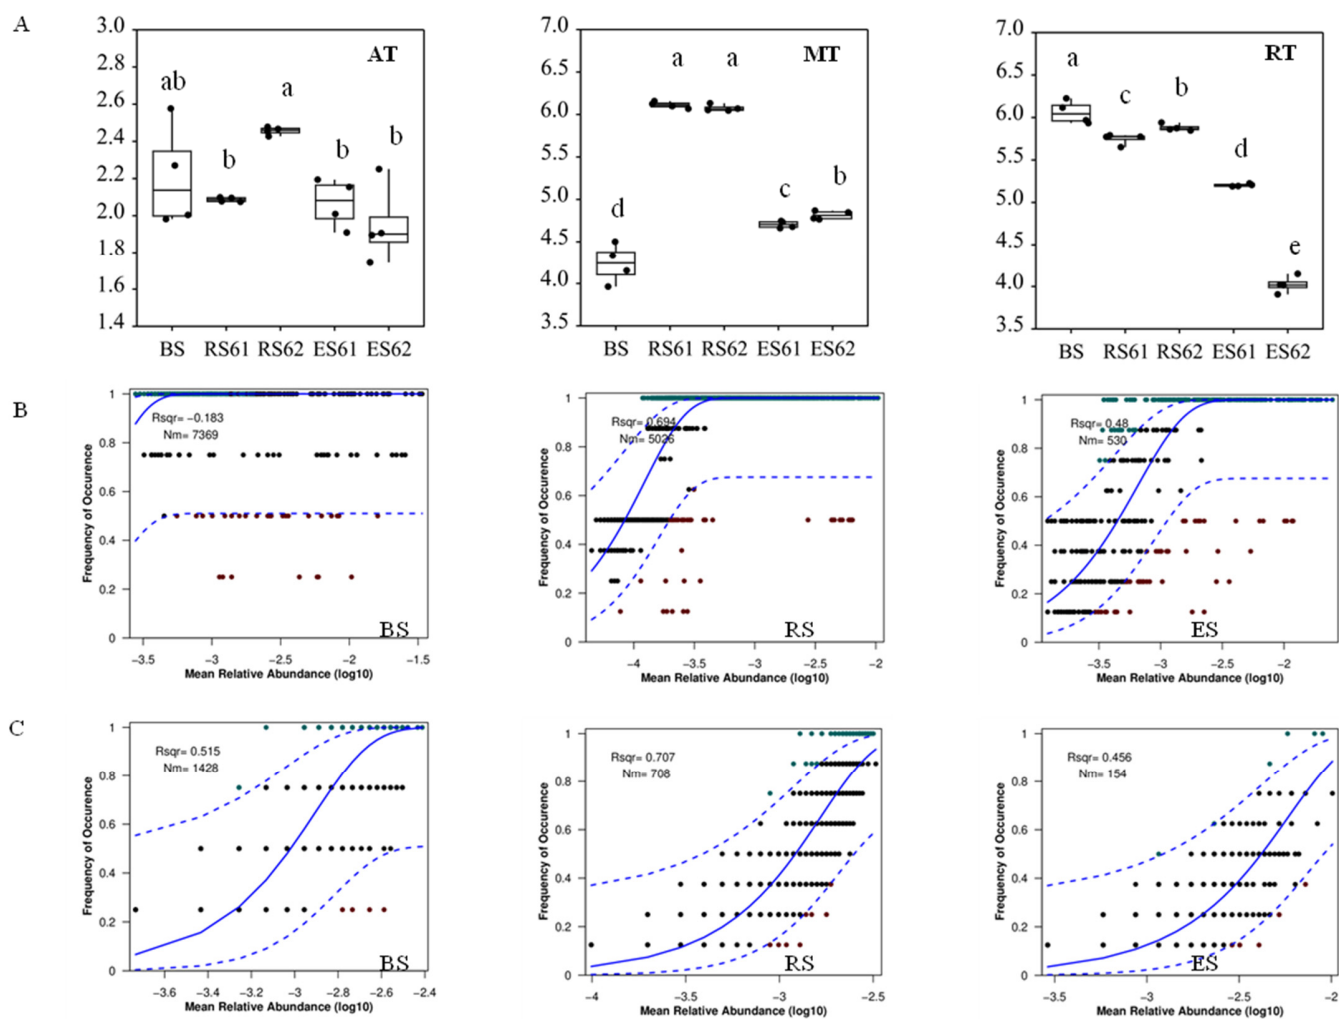

Fig S4

Supplement: s1 [file s1]
